# Supplementary material for: Best of both worlds: Diels–Alder chemistry towards fabrication of redox-responsive degradable hydrogels for protein release
Source: Royal Society of Chemistry journal article supplement (doi:10.1039/c6ra16126j), 2016-01-01
Supplement: c6ra16126j1.pdf [file c6ra16126j1.pdf]

## SUPPORTING INFORMATION

# Best of Both Worlds: Diels-Alder Chemistry towards Fabrication of Redox-Responsive Degradable Hydrogels for Protein Release

*Ismail Altinbasak,<sup>a</sup> Rana Sanyal<sup>a,b</sup> and Amitav Sanyal<sup>a,b\*</sup>*

<sup>a</sup>Bogazici University, Department of Chemistry, Bebek, 34342, Istanbul, Turkey.

<sup>b</sup>Bogazici University, Center for Life Sciences and Technologies, Istanbul, Turkey.

### CONTENTS:

Figure S1. GPC trace of copolymer in THF

Figure S2. Synthesis of bismaleimide crosslinker

Figure S3. <sup>1</sup>H NMR of bismaleimide crosslinker

Figure S4. <sup>13</sup>C NMR of bismaleimide crosslinker

Figure S5. Hydrolytic stability of the maleimide crosslinker

Figure S6. Strain sweep test of hydrogel HG2

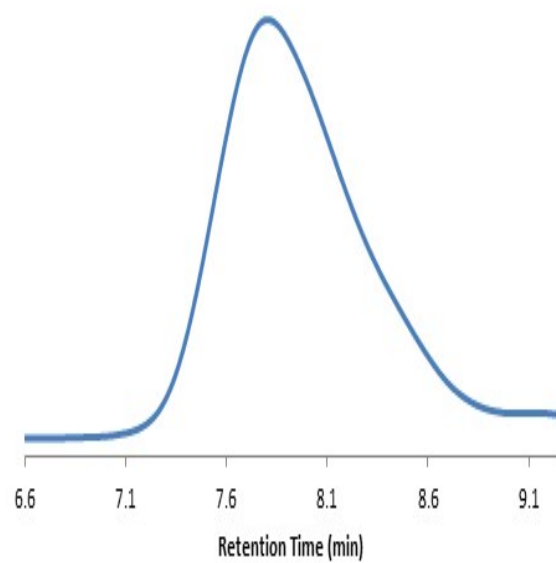

Figure S1. GPC trace of copolymer in THF.

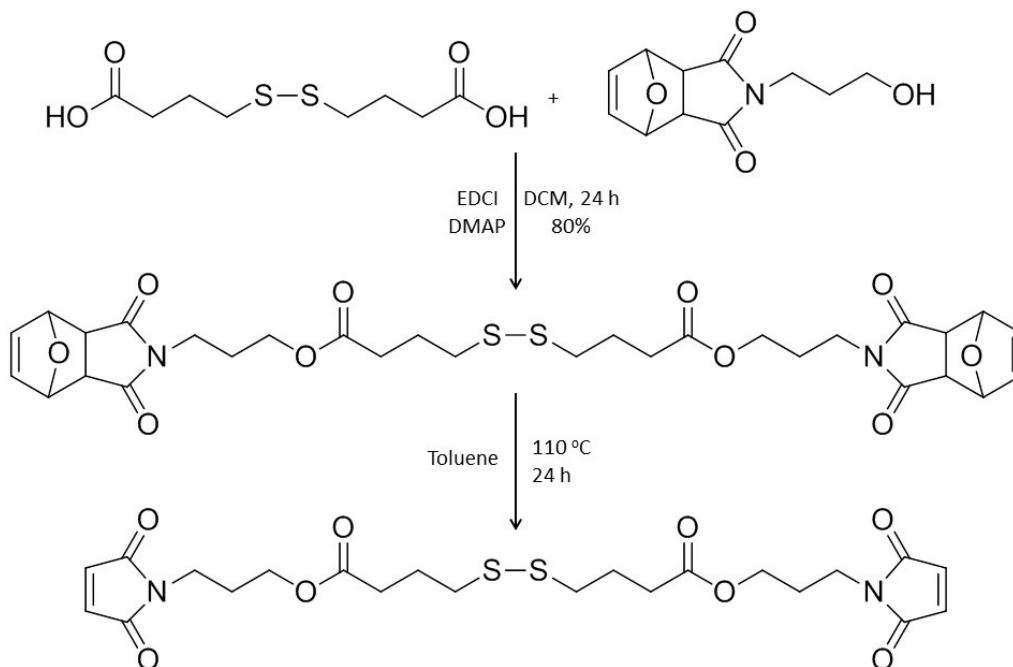

Figure S2. Synthesis of bismaleimide crosslinker.

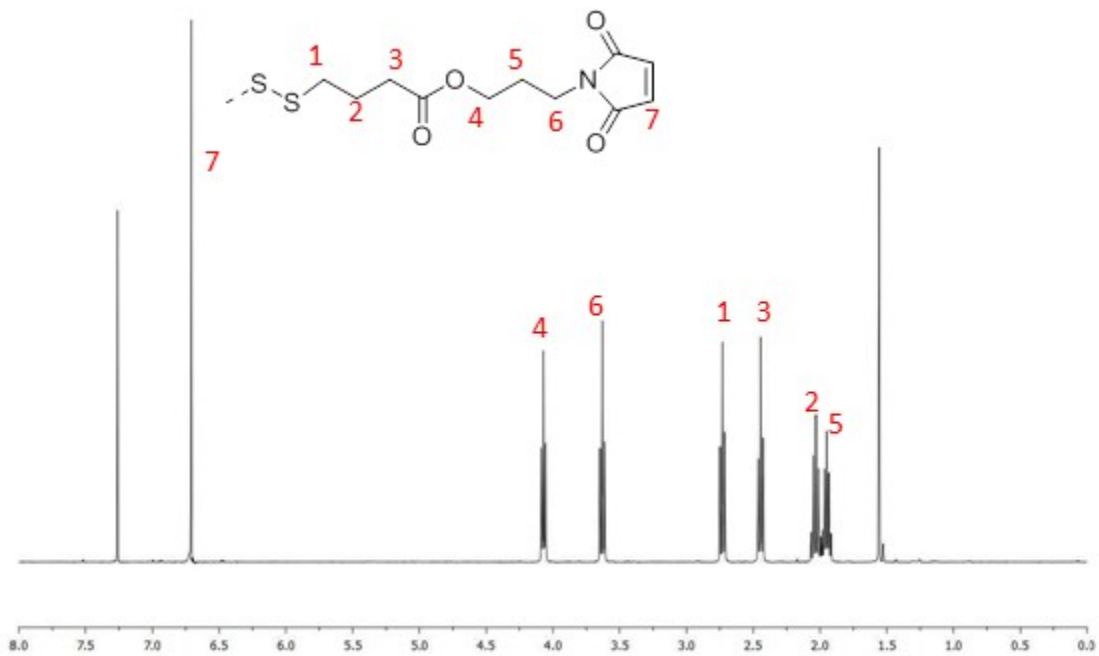

Figure S3. <sup>1</sup>H NMR of bismaleimide crosslinker

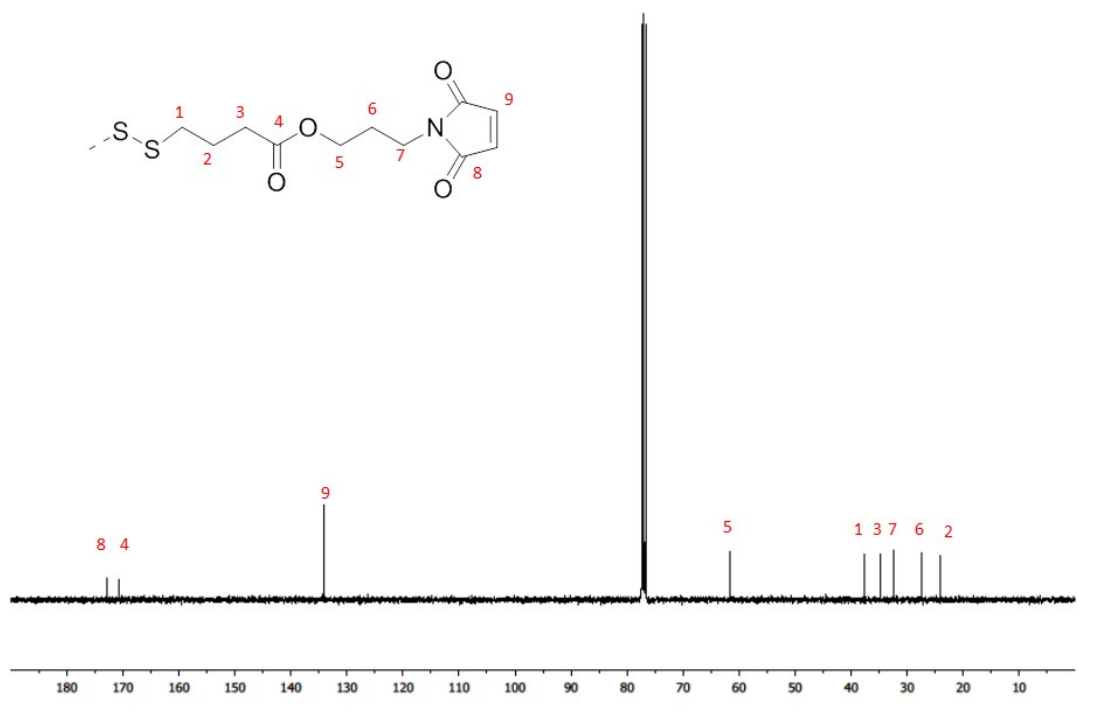

Figure S4. <sup>13</sup>C NMR of bismaleimide crosslinker

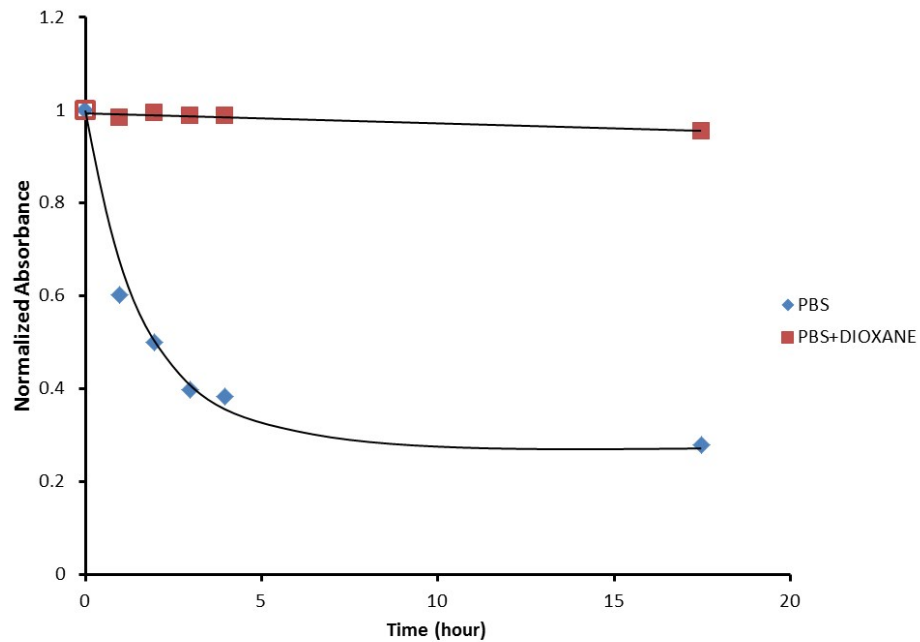

Figure S5. Hydrolytic stability of the maleimide crosslinker

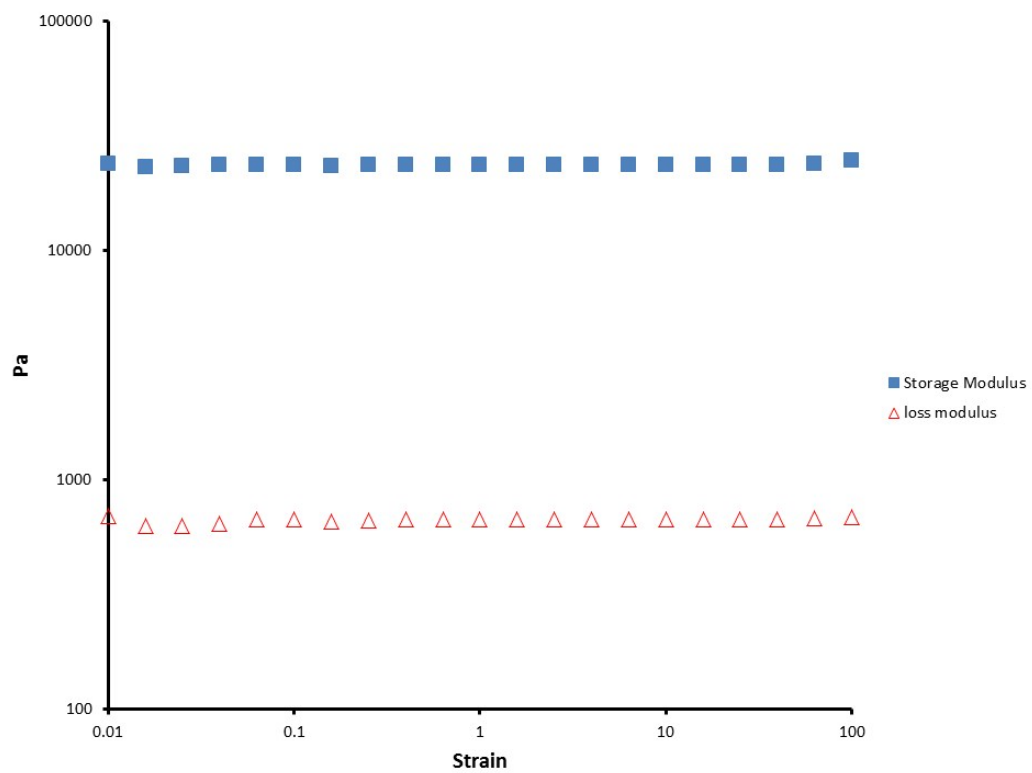

Figure S6. Strain sweep test of hydrogel HG2.
